# Supplementary material for: Controlled defects to link wetting properties to surface heterogeneity
Source: Royal Society of Chemistry journal article supplement (doi:10.1039/c8sm01715h), 2018-01-01
Supplement: c8sm01715h1.pdf [file c8sm01715h1.pdf]

Supplementary Information for

# Controlled defects to link wetting properties to surface heterogeneity

Romain Lhermerout<sup>a</sup> and Kristina Davitt<sup>\*a</sup>

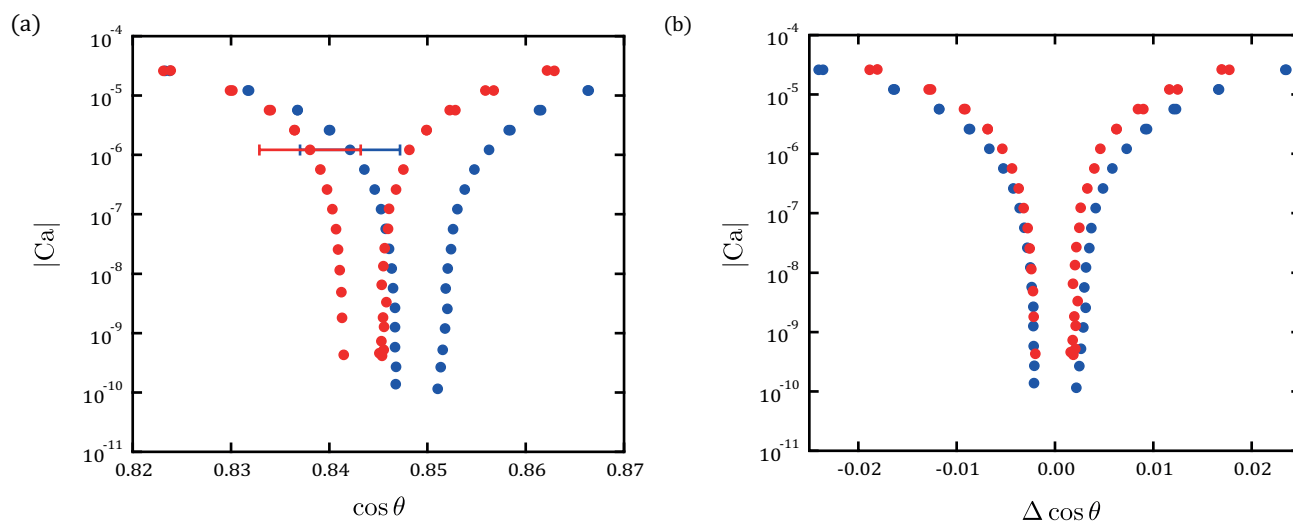

Figure 1: Contact line dynamics measured on the reference surface (red symbols) and on a surface covered with defects (blue symbols) using hexadecane. The defects were sintered at  $1170^\circ\text{C}$  and have a concentration of  $n = 5.9\mu\text{m}^{-2}$ . (a) Error bars shown on the data point taken at  $10\mu\text{m s}^{-1}$  correspond to the uncertainty in the absolute angle. (b) Curves shifted to facilitate comparison of the low-velocity slope.

<sup>a</sup> Laboratoire de Physique Statistique (LPS), UMR 8550 CNRS, ENS, Univ. Paris Diderot, Sorbonne Université, 24 rue Lhomond, 75005, Paris, France.

\* E-mail: kristina.davitt@lps.ens.fr
